# Supplementary material
Source: bioRxiv or medRxiv preprint supplement (https://www.biorxiv.org/highwire/filestream/44774/field_highwire_adjunct_files/0/150656-1.pdf)

# Supplementary Figure 1.

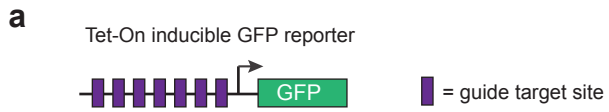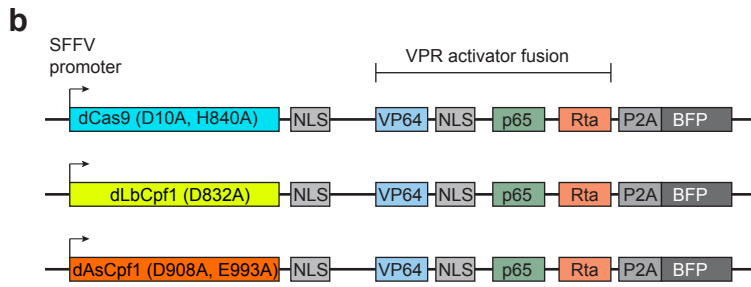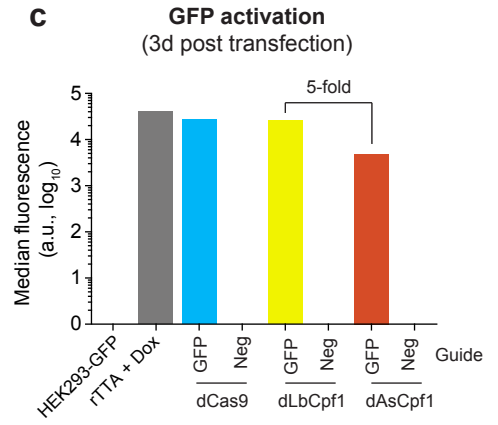

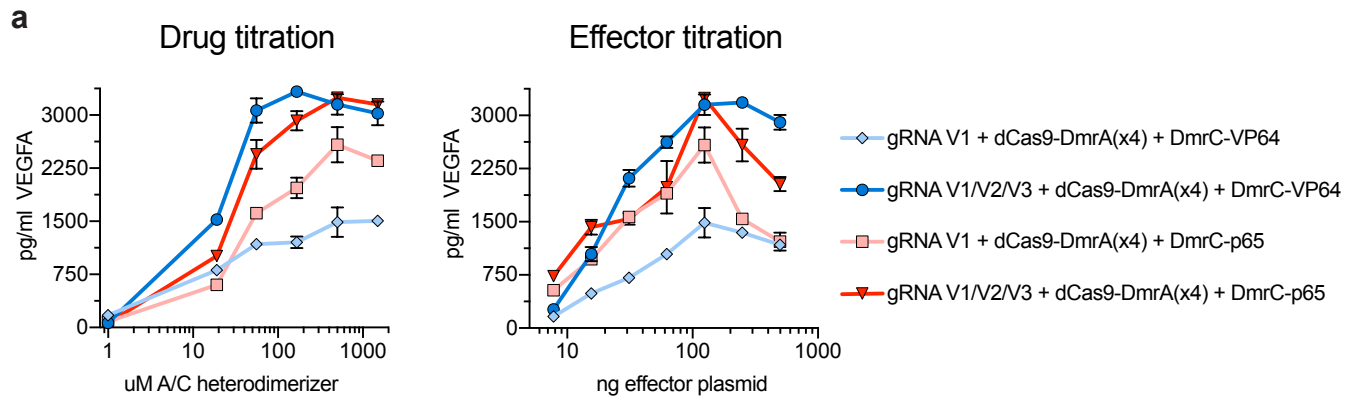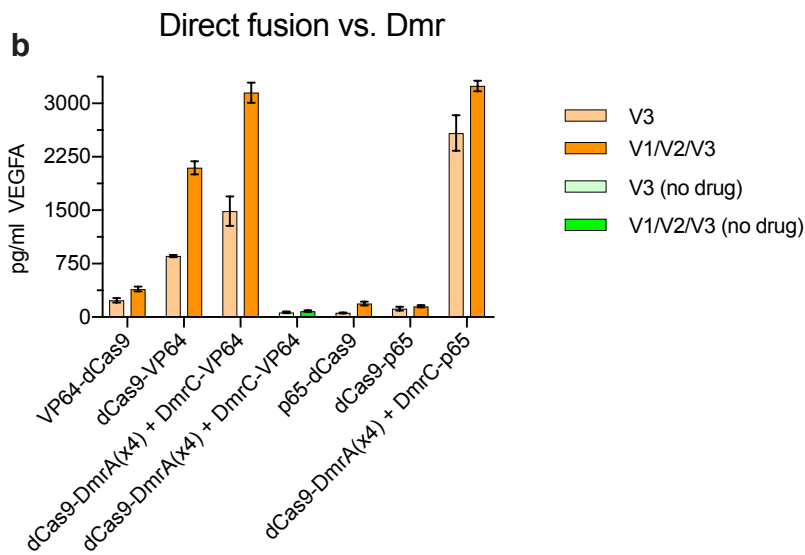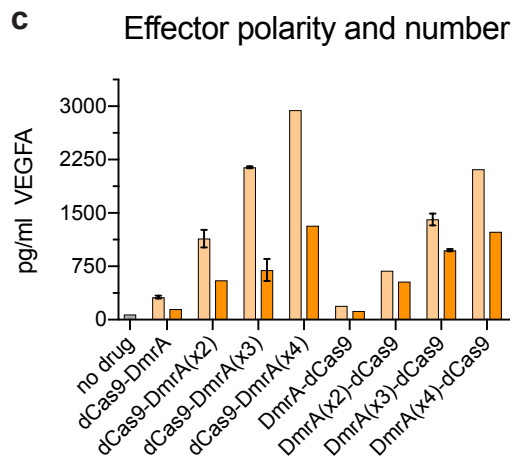

Supplement: Supplementary file [file 150656-1.pdf]
